# Supplementary material for: The RhoGAP activity of CYK-4/MgcRacGAP functions non-canonically by promoting RhoA activation during cytokinesis
Source: eLife journal article supplement (doi:10.7554/elife.08898), 2015-08-07
Supplement: supp [file elife-08898-supp-v1.zip]

**Supplementary Table 1. *C. elegans* strains used in this study.**

| <b>Strain No.</b> | <b>Genotype</b>                                                                                                                                           |
|-------------------|-----------------------------------------------------------------------------------------------------------------------------------------------------------|
| N2                | <i>wild type</i>                                                                                                                                          |
| MG685             | <i>mgSi43[cyk-4::gfp::pie-1 3'utr, cb-unc-119(+)] II; unc-119(ed3) III</i>                                                                                |
| MG695             | <i>mgSi44[cyk-4(<math>\Delta</math>C1)::gfp::pie-1 3'utr, cb-unc-119(+)] II; unc-119(ed3) III</i>                                                         |
| MG716             | <i>mgSi16[cyk-4(r459a)::gfp::pie-1 3'utr, cb-unc-119(+)] II; unc-119(ed3) III</i>                                                                         |
| MG733             | <i>mgSi19[cyk-4(e448k)::gfp::pie-1 3'utr, cb-unc-119(+)] II; unc-119(ed3) III</i>                                                                         |
| MG804             | <i>mgSi33[cyk-4(k495e, r499e)::gfp::pie-1 3'utr, cb-unc-119(+)] II; unc-119(ed3) III</i>                                                                  |
| MG822             | <i>mgSi16[cyk-4(r459a)::gfp::pie-1 3'utr, cb-unc-119(+)] II; cyk-4(ok1034)/unc-64 III</i>                                                                 |
| MG725             | <i>mgSi43[cyk-4::gfp::pie-1 3'utr, cb-unc-119(+)] II; ltIs44[pAA173; pie-1p-mCherry::PH(PLC1delta1), cb-unc-119(+)] V</i>                                 |
| MG726             | <i>mgSi44[cyk-4(<math>\Delta</math>C1)::gfp::pie-1 3'utr, cb-unc-119(+)] II; ltIs44[pAA173; pie-1p-mCherry::PH(PLC1delta1), cb-unc-119(+)] V</i>          |
| MG729             | <i>mgSi16[cyk-4(r459a)::gfp::pie-1 3'utr, cb-unc-119(+)] II; ltIs44[pAA173; pie-1p-mCherry::PH(PLC1delta1), cb-unc-119(+)] V</i>                          |
| MG815             | <i>mgSi33[cyk-4(k495e, r499e)::gfp::pie-1 3'utr, cb-unc-119(+)] II; ltIs44[pAA173; pie-1p-mCherry::PH(PLC1delta1), cb-unc-119(+)] V</i>                   |
| MG730             | <i>nop-1(it142) III; mgSi43[cyk-4::gfp::pie-1 3'utr, cb-unc-119(+)] II; ltIs44[pAA173; pie-1p-mCherry::PH(PLC1delta1), cb-unc-119(+)] V</i>               |
| MG737             | <i>nop-1(it142) III; mgSi16[cyk-4(r459a)::gfp::pie-1 3'utr, cb-unc-119(+)] II; ltIs44[pAA173; pie-1p-mCherry::PH(PLC1delta1), cb-unc-119(+)] V</i>        |
| MG816             | <i>nop-1(it142) III; mgSi33[cyk-4(k495e, r499e)::gfp::pie-1 3'utr, cb-unc-119(+)] II; ltIs44[pAA173; pie-1p-mCherry::PH(PLC1delta1), cb-unc-119(+)] V</i> |
| MG717             | <i>ced-10(n1993) IV; mgSi16[cyk-4(r459a)::gfp::pie-1 3'utr, cb-unc-119(+)] II; ltIs44[pAA173; pie-1p-mCherry::PH(PLC1delta1), cb-unc-119(+)] V</i>        |
| MG764             | <i>mgSi43[cyk-4::gfp::pie-1 3'utr, cb-unc-119(+)] II; zwIS151[nmy-2::rfp, cb-unc-119(+)]</i>                                                              |
| MG766             | <i>mgSi44[cyk-4(<math>\Delta</math>C1)::gfp::pie-1 3'utr, cb-unc-119(+)] II; zwIS151[nmy-2::rfp, cb-unc-119(+)]</i>                                       |
| MG765             | <i>mgSi16[cyk-4(r459a)::gfp::pie-1 3'utr, cb-unc-119(+)] II; zwIS151[nmy-2::rfp, cb-unc-119(+)]</i>                                                       |
| MG817             | <i>mgSi33[cyk-4(k495e, r499e)::gfp::pie-1 3'utr, cb-unc-119(+)] II; zwIS151[nmy-2::rfp, cb-unc-119(+)]</i>                                                |
| EU1404            | <i>cyk-4(or749ts) III</i>                                                                                                                                 |

| Strain No. | Genotype                                                                                                                                                                                                            |
|------------|---------------------------------------------------------------------------------------------------------------------------------------------------------------------------------------------------------------------|
| MG797      | <i>ect-2(xs110) II; cyk-4(or749ts) III</i>                                                                                                                                                                          |
| MG776      | <i>ect-2(xs111) II; cyk-4(or749ts) III</i>                                                                                                                                                                          |
| MG855      | <i>ect-2(xs110 generated by CRISPR) II; cyk-4(or749ts) III</i>                                                                                                                                                      |
| MG863      | <i>ect-2(xs110 generated by CRISPR) II</i>                                                                                                                                                                          |
| MG887      | <i>ect-2(xs111) II</i>                                                                                                                                                                                              |
| MG886      | <i>cyk-4<sup>R459A</sup>/unc-64 III</i>                                                                                                                                                                             |
| MG903      | <i>ect-2(xs110) II; cyk-4<sup>R459A</sup> III</i>                                                                                                                                                                   |
| MG904      | <i>ect-2(xs111) II; cyk-4<sup>R459A</sup> III</i>                                                                                                                                                                   |
| MG873      | <i>unc-4(e120) ect-2(xs110) II;<br/>ItIs37[pAA64; pie-1p-mCHERRY::his-58, cb-unc-119 (+)] IV;<br/>ItIs44[pAA173; pie-1p-mCherry::PH(PLC1delta1), cb-unc-119(+)] zuls45<br/>[nmy-2::NMY-2::GFP, cb-unc-119(+)] V</i> |
| MG512      | <i>cyk-4(or749ts) nop-1(it142) III</i>                                                                                                                                                                              |
| OD239      | <i>cyk-4(or749)ts ItIs38[pAA1; pie-1p-GFP::PH(PLC1delta1), cb-unc-119 (+)] III;<br/>ItIs37[pAA64; pie-1p-mCHERRY::his-58; unc-119 (+)] IV</i>                                                                       |
| MG582      | <i>cyk-4(or749)ts ItIs38[pAA1; pie-1p-GFP::PH(PLC1delta1), cb-unc-119 (+)] III;<br/>ced-10(n1993) ItIs37[pAA64; pie-1p-mCHERRY::his-58; unc-119 (+)] IV</i>                                                         |
| MG503      | <i>nop-1(it142) ItIs38[pAA1; pie-1p-GFP::PH(PLC1delta1), cb-unc-119 (+)] III;<br/>ced-10(n1993) IV</i>                                                                                                              |
| MG936      | <i>nop-1(it142) III; ced-10(n1993) IV; mgSi16[cyk-4(R459A)::gfp rRNAi, cb-<br/>unc-119(+)] II; ItIs44[pAA173; pie-1p-mCherry::PH(PLC1delta1), cb-unc-119(+)]<br/>V</i>                                              |
| NG103      | <i>mig-2(gm103) X</i>                                                                                                                                                                                               |
