# Supplementary material for: The RhoGAP activity of CYK-4/MgcRacGAP functions non-canonically by promoting RhoA activation during cytokinesis
Source: eLife journal article supplement (doi:10.7554/elife.08898), 2015-08-07

Figure 7–figure supplement 2

A

| genotype                     | ECT-2 state (inferred)            | RhoA GEF activity                                                                 |
|------------------------------|-----------------------------------|-----------------------------------------------------------------------------------|
| <i>cyk-4(+)</i>              | ECT-2:pCYK-4:RhoA•GDP (or GDP+Pi) |  |
| <i>cyk-4<sup>R459A</sup></i> | ECT-2:pCYK-4:RhoA•GTP             |                                                                                   |
| <i>cyk-4<sup>EE</sup></i>    | ECT-2:pCYK-4                      |                                                                                   |
| <i>cyk-4(RNAi)</i>           | ECT-2                             |                                                                                   |

B

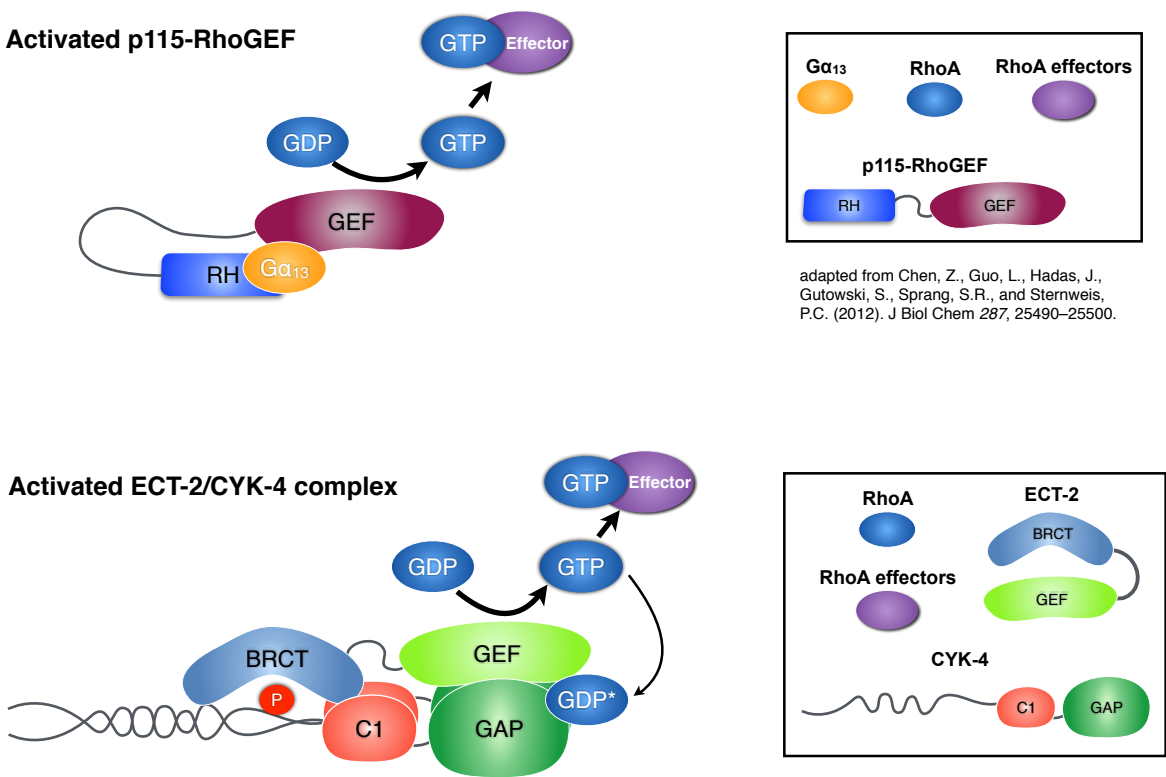

Supplement: supp [file elife-08898-supp-v1.zip]
