# Supplementary material for: The RhoGAP activity of CYK-4/MgcRacGAP functions non-canonically by promoting RhoA activation during cytokinesis
Source: eLife journal article supplement (doi:10.7554/elife.08898), 2015-08-07
Supplement: supp [file elife-08898-supp-v1.zip]

Figure 6—figure supplement 1

| Strain                                     | Brood Size (n) | Hatching (%) |
|--------------------------------------------|----------------|--------------|
| <i>N2</i>                                  | 218.2±10.3     | 99.7±0.2     |
| <i>cyk-4(ok1034)</i>                       | n/t            | n/t          |
| <i>cyk-4::gfp; cyk-4(ok1034)</i>           | 202.2±8.6      | 97.5±0.5     |
| <i>cyk-4<sup>R459A</sup>(CRISPR)</i>       | 0              | n/t          |
| <i>cyk-4(or749ts)</i>                      | n/t            | 16.9±0.4*    |
| <i>ced-10(n1993); cyk-4(or749ts)</i>       | n/t            | 17.8±0.5*    |
| <i>ect-2(xs110)</i>                        | 194.0±12.8     | 99.0±0.2     |
| <i>ect-2(xs110); cyk-4(or749ts)</i>        | 200.2±6.8      | 97.4±0.5     |
| <i>ect-2(xs111)</i>                        | 126.7±8.3      | 97.5±0.7     |
| <i>ect-2(xs111); cyk-4(or749ts)</i>        | 189.6±16.3     | 98.2±0.4     |
| <i>ect-2(xs110); cyk-4<sup>R459A</sup></i> | 151.8±8.8      | 90.9±0.6     |
| <i>ect-2(xs111); cyk-4<sup>R459A</sup></i> | 168.4±4.4      | 93.0±0.4     |
| <i>ect-2<sup>G707D</sup>(CRISPR)</i>       | 186.2±5.7      | 98.6±0.4     |

\* hatched worms are sterile
