# Supplementary material for: The RhoGAP activity of CYK-4/MgcRacGAP functions non-canonically by promoting RhoA activation during cytokinesis
Source: eLife journal article supplement (doi:10.7554/elife.08898), 2015-08-07
Supplement: supp [file elife-08898-supp-v1.zip]

**Supplementary Table 2. List of oligos used in this study.**

|                                   | <b>Oligo No.</b> | <b>Sequences</b>                                                 |
|-----------------------------------|------------------|------------------------------------------------------------------|
| MosSCI                            | MG4199           | GAAACGTGGCACGCCGGCGTGGACTAATGG                                   |
|                                   | MG4200           | CCGCCTTGATGGCCGGCTAGCGAATTCCA                                    |
|                                   | MG4276           | CGAGCCTTCAGGGCAACCACAC                                           |
|                                   | MG4277           | TGCCCTGAAGGCTCGTGGACTC                                           |
|                                   | MG4202           | GGAACGGCGTAAATACCTTCCTGCGTGAG                                    |
|                                   | MG4201           | TATTTACGCCGTTCTGGGCAGGTTAGAACT                                   |
|                                   | MG4489           | CGGGTCTTTAAGATCCTCTAGGAACCGCTCCAAGGTGTCTG<br>TGATGACCTC          |
|                                   | MG4488           | GAGGTCATCACAGACACCTTGGAGCGGTTCTAGAGGATC<br>TTAAAGACCCG           |
|                                   | MG4070           | CGTGGTATTGGTCTCATTGCGATGTCACGAG                                  |
|                                   | MG4071           | GAGACCAATACCACGCCCAAGACGA                                        |
| sgRNA                             | MG4735           | CGTCCCAGACTACGCCTAAACTAGTGATAAATG                                |
|                                   | MG4736           | CAGGGTTATTGTCTCATGAGCGGATACATATTTG                               |
|                                   | MG4773           | <b>TGCTCGTCACGATGAATCAGG</b> CAAGACATCTCGCAATAGG                 |
|                                   | MG4774           | <b>CCTGATTCATCGTGACGAGCAG</b> TTTTAGAGCTAGAAATAGC<br>AAGT        |
|                                   | MG4890           | <b>TTCTAACCTGCCAGGAACG</b> GTTTTAGAGCTAGAAATAGCA<br>AGT          |
|                                   | MG4891           | <b>CGTTCCTGGGCAGGTTAGA</b> ACAAGACATCTCGCAATAGG                  |
| oligonucleotide<br>template (ODN) | MG4801           | TTGTATGGTGCCTGATTCATCGTGACGAGCAAGATGGTGAC<br>ATTGACACAGTCTTCGAAT |
|                                   | MG4902           | ACATTGACAGTTCTAACCTGCCAGGAACGGCGTAAATACCT<br>TCCTGCGTGAGTCCACGA  |

\* Target sequences of sgRNA are highlighted.
