# Supplementary figures and images for: The RhoGAP activity of CYK-4/MgcRacGAP functions non-canonically by promoting RhoA activation during cytokinesis
Source: eLife journal article supplement (doi:10.7554/elife.08898), 2015-08-07

Figure 6—figure supplement 3

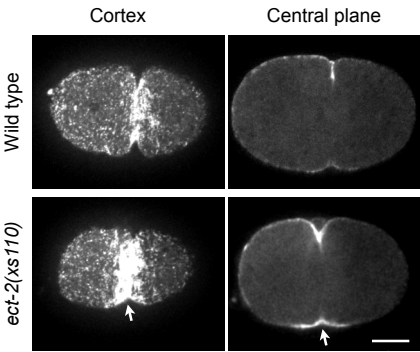

Supplement: supp [file elife-08898-supp-v1.zip]

Figure 6—figure supplement 4

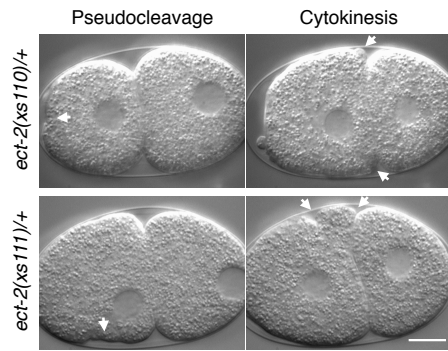

Supplement: supp [file elife-08898-supp-v1.zip]

Figure 1—figure supplement 3

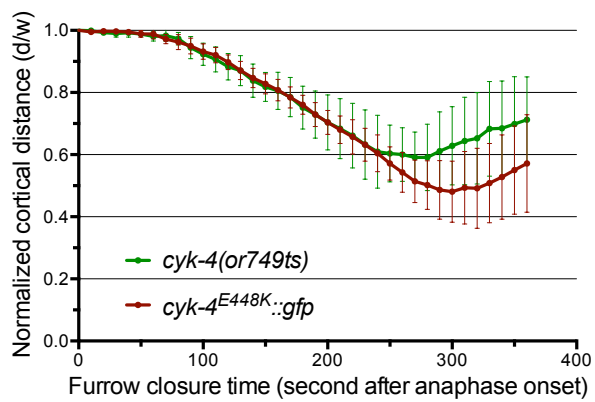

Supplement: supp [file elife-08898-supp-v1.zip]

Figure 5–figure supplement 2

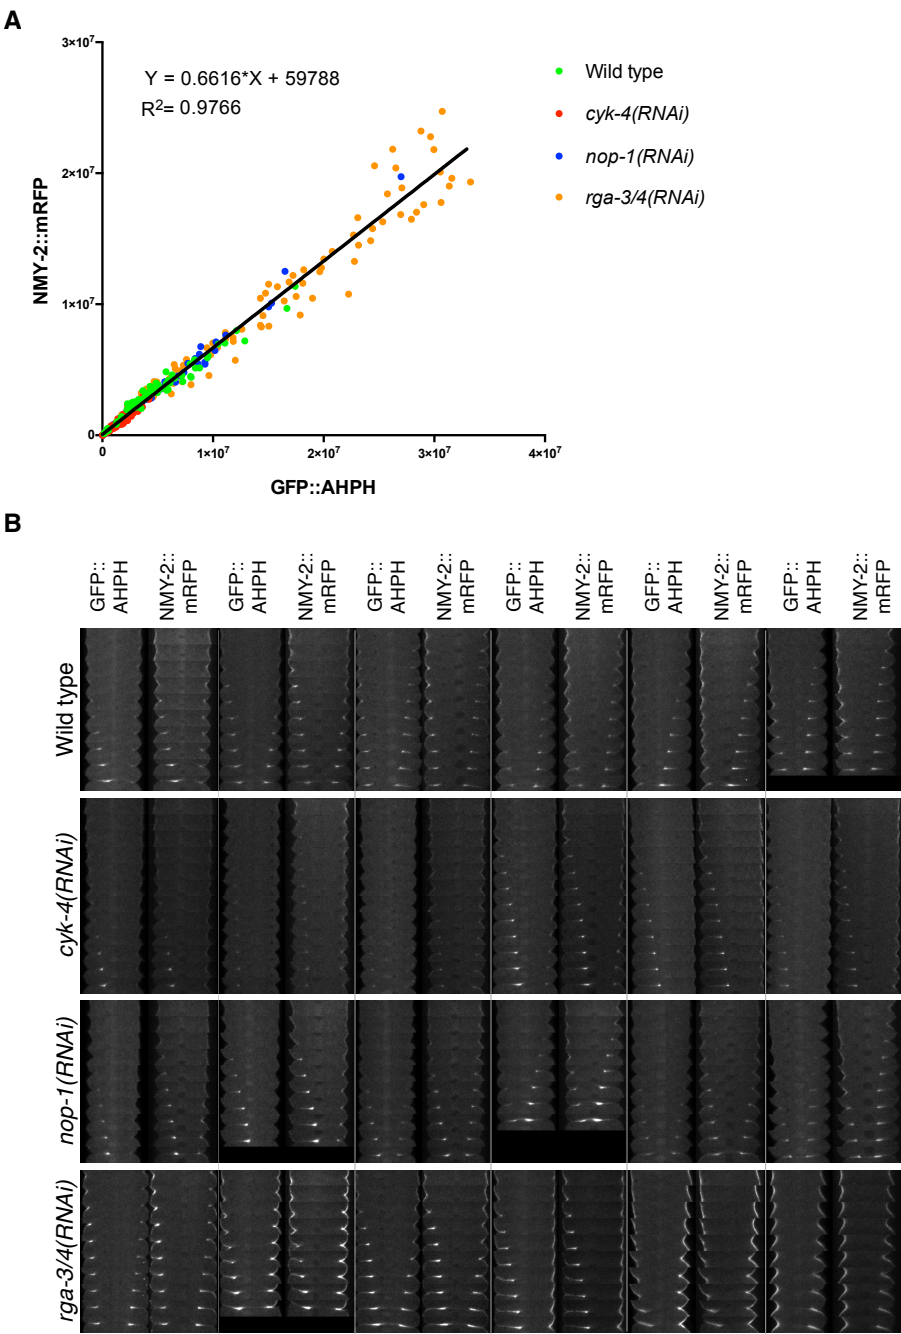

Supplement: supp [file elife-08898-supp-v1.zip]

Figure 7–figure supplement 1

**A**

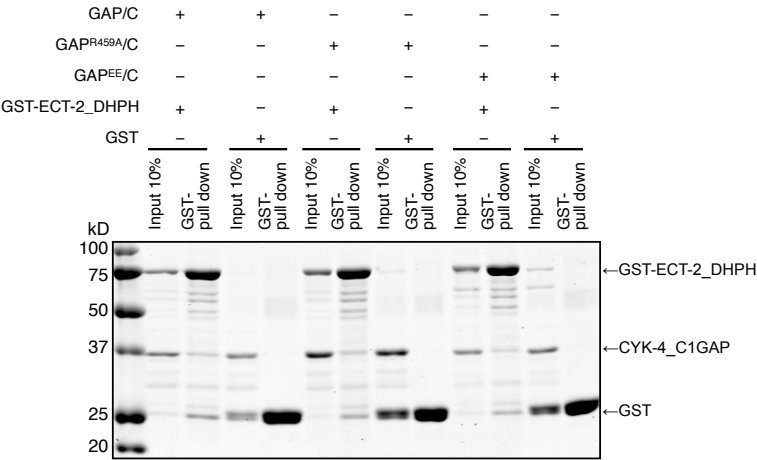

**B**

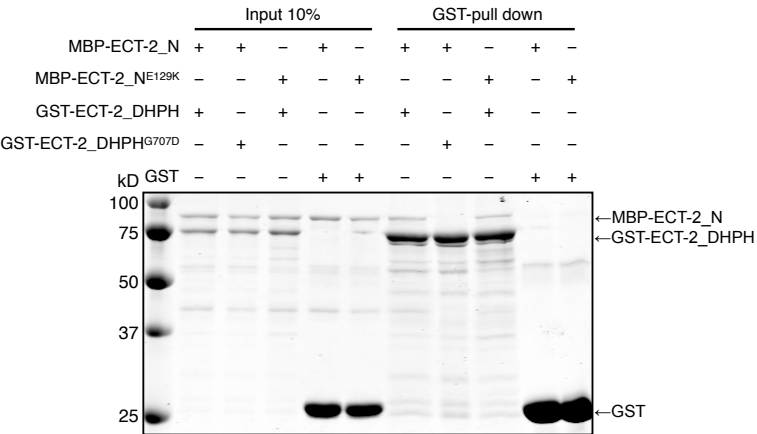

**C**

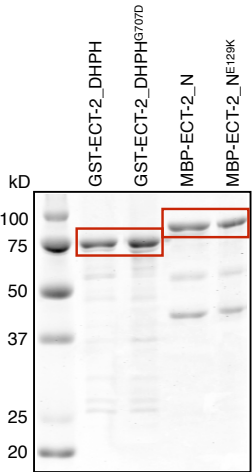

Supplement: supp [file elife-08898-supp-v1.zip]

Figure 4—figure supplement 2

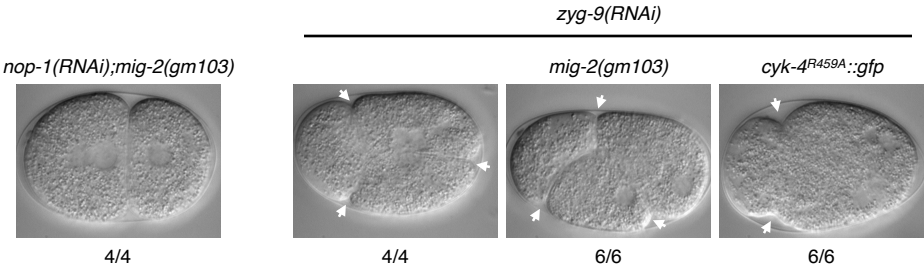

Supplement: supp [file elife-08898-supp-v1.zip]

Figure 2–figure supplement 1

A

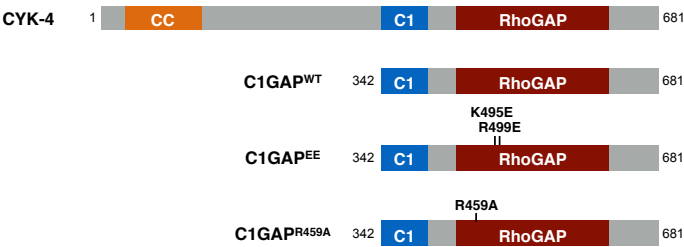

B

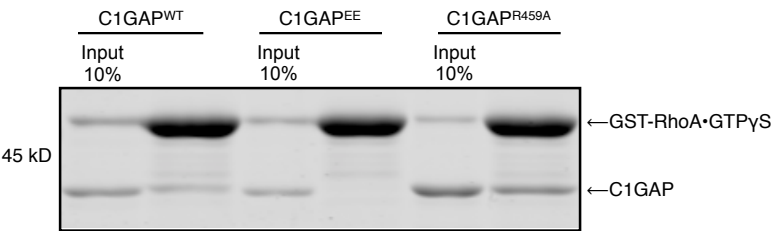

C

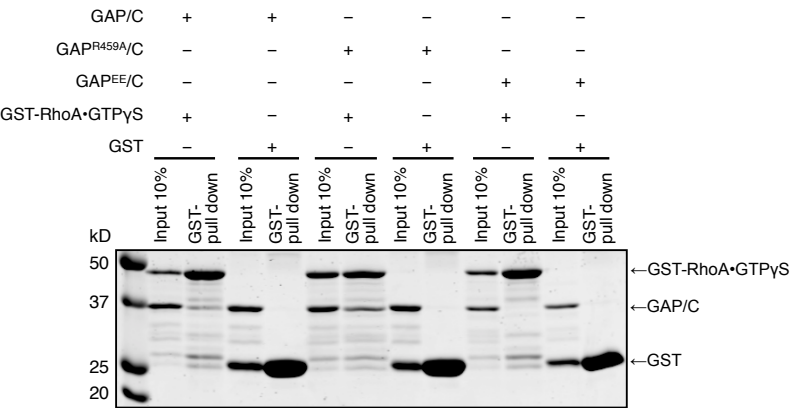

D

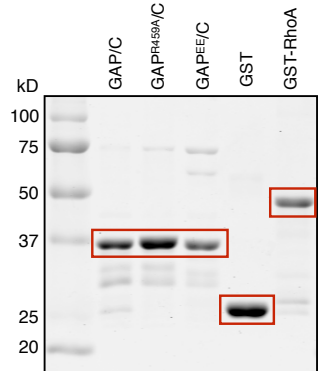

Supplement: supp [file elife-08898-supp-v1.zip]

**A**

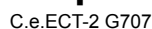

**B**

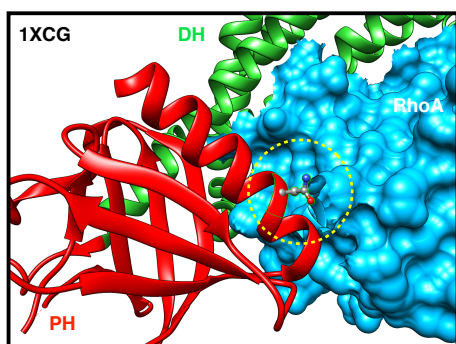

Supplement: supp [file elife-08898-supp-v1.zip]

Figure 1–figure supplement 2

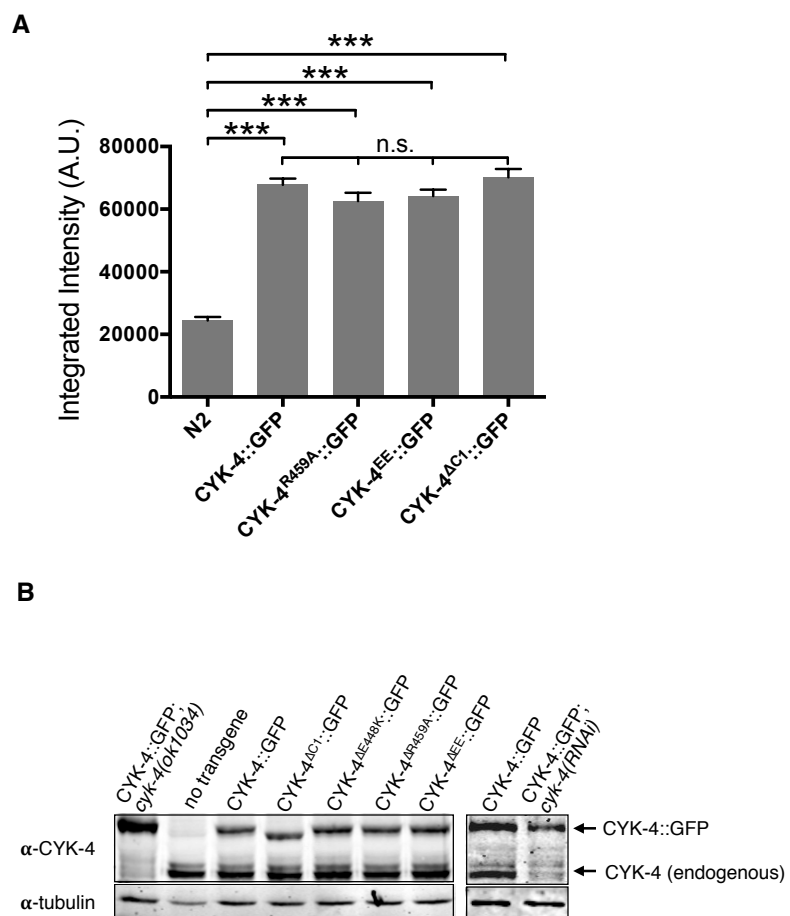

Supplement: supp [file elife-08898-supp-v1.zip]

Figure 2–figure supplement 2

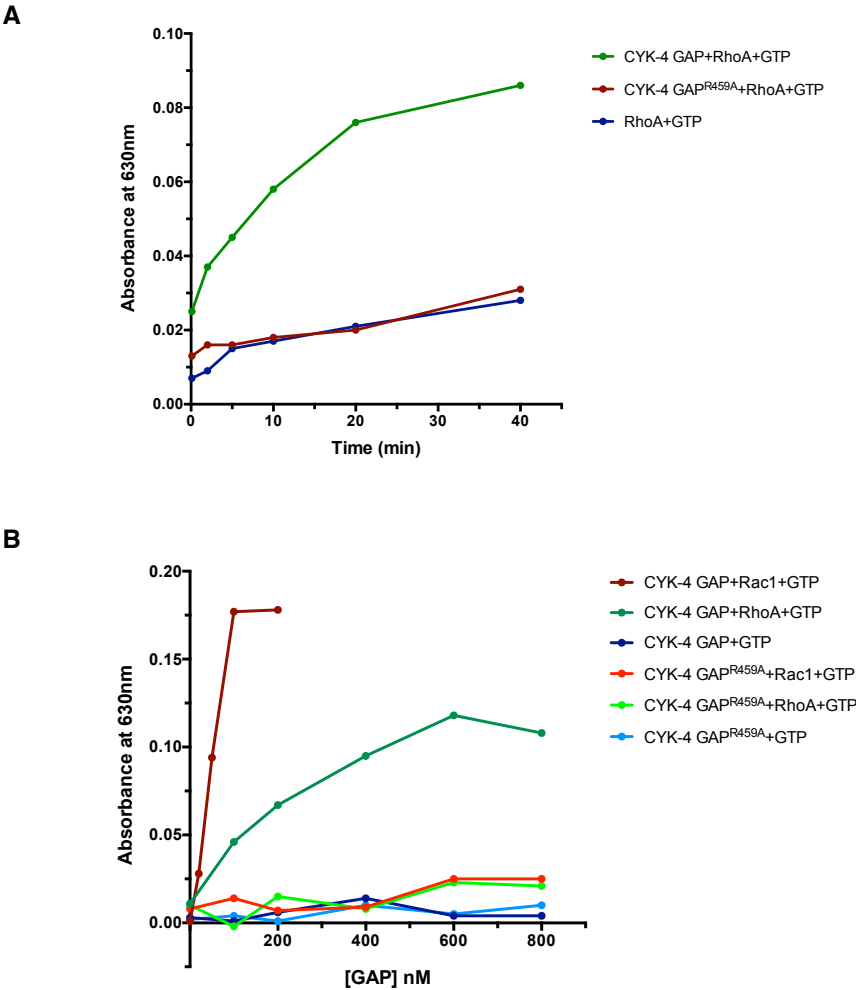

Supplement: supp [file elife-08898-supp-v1.zip]

Figure 1—figure supplement 1

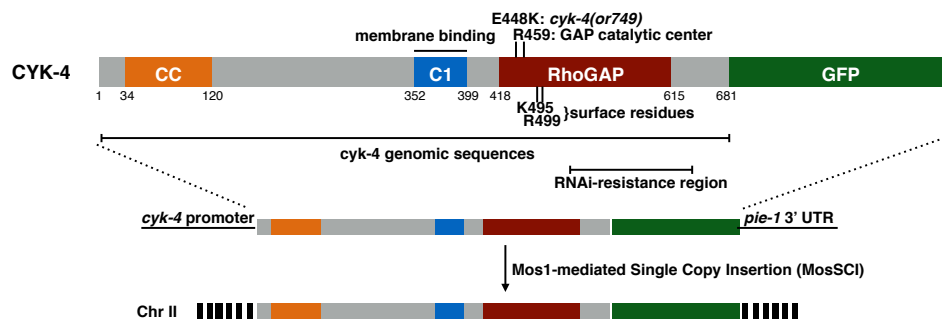

Supplement: supp [file elife-08898-supp-v1.zip]

Figure 1—figure supplement 4

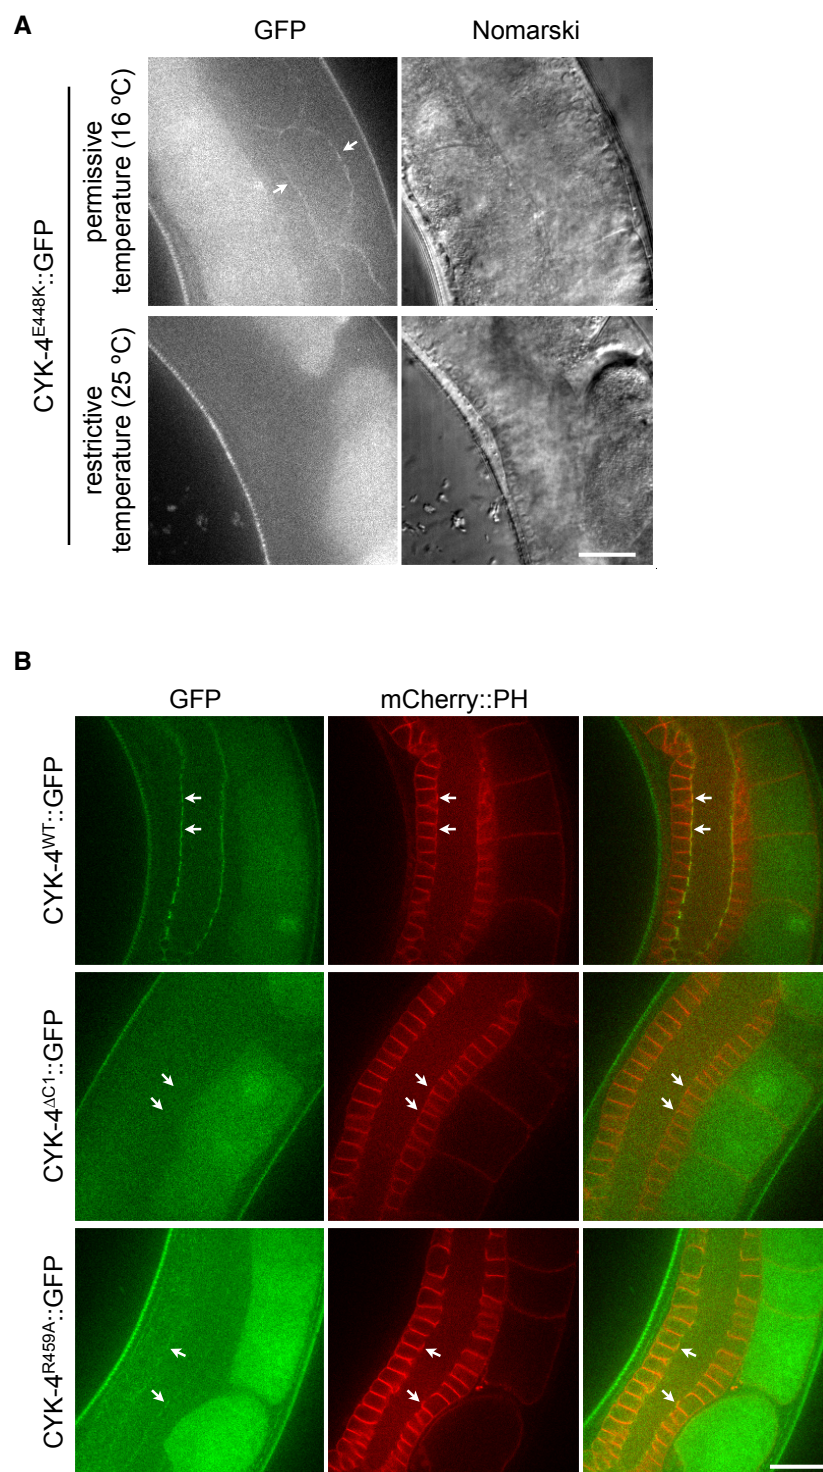

Supplement: supp [file elife-08898-supp-v1.zip]

Figure 3—figure supplement 1

**A**

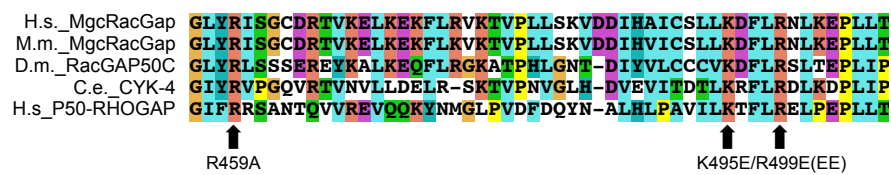

**B**

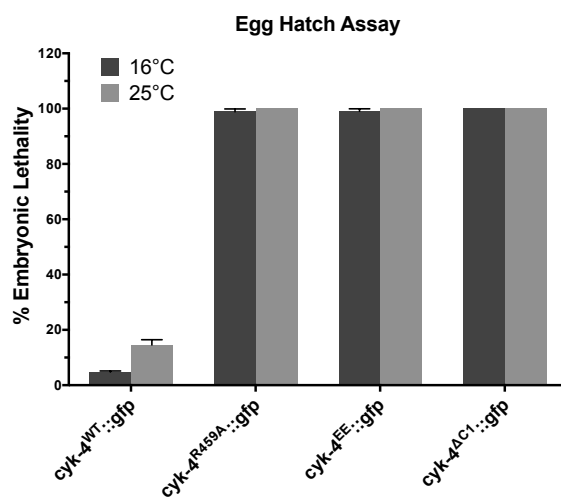

Supplement: supp [file elife-08898-supp-v1.zip]

Figure 5—figure supplement 1

**A**

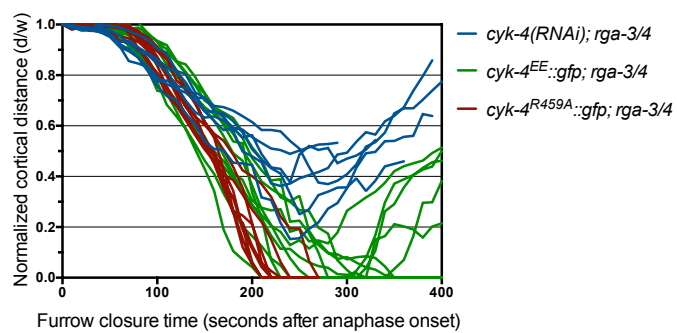

**B**

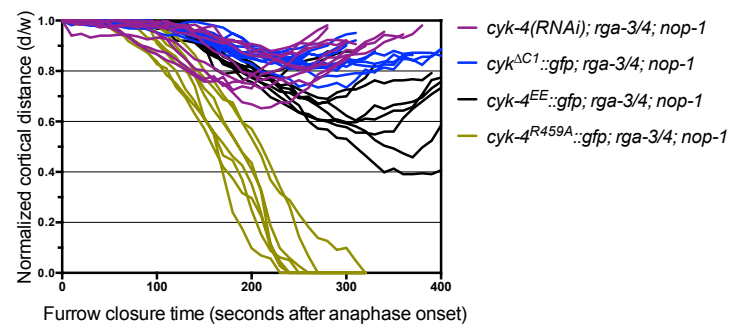

Supplement: supp [file elife-08898-supp-v1.zip]

Figure 4—figure supplement 1

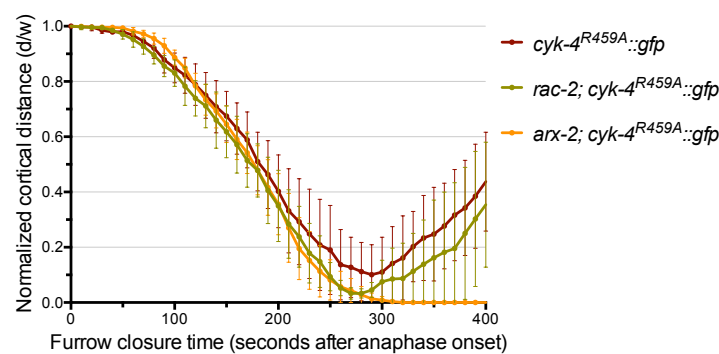

Supplement: supp [file elife-08898-supp-v1.zip]

Figure 4—figure supplement 3

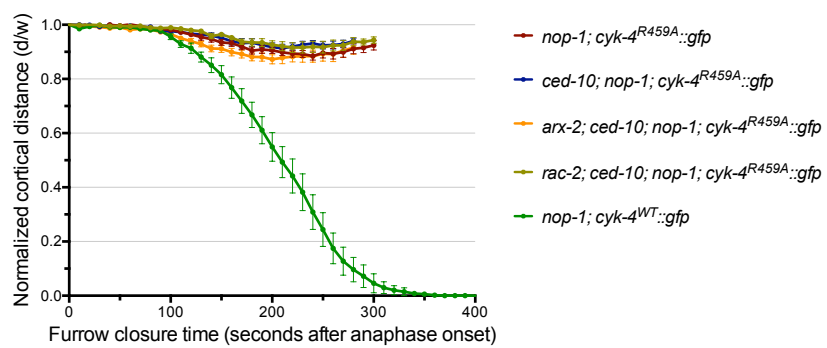

Supplement: supp [file elife-08898-supp-v1.zip]
